# Supplementary material
Source: Springer Nature journal article supplement (https://www.springermedizin.de/resource/supplementary/12943_2009_648_MOESM6_ESM.pdf/9554480)

**A****Total number of tumor spheres**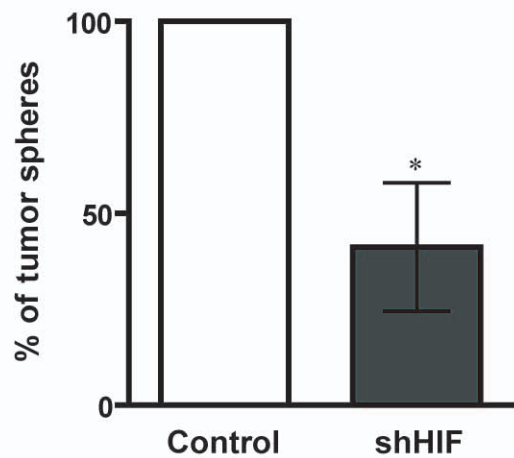**B****Average size of tumor spheres**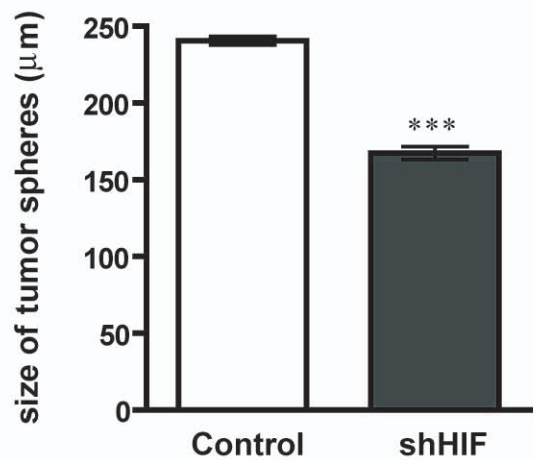**C**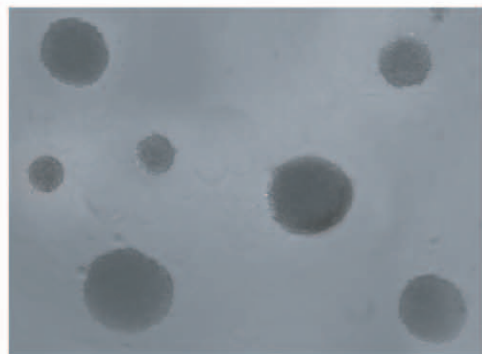**Control**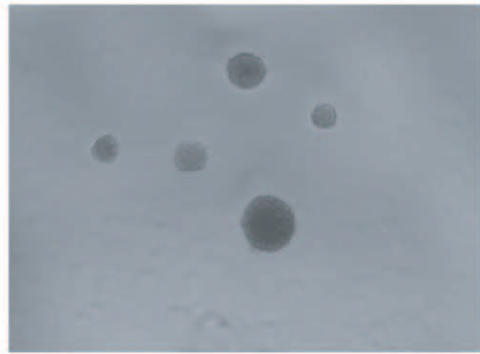**shHIF**

Supplement: MOESM6 [file 9554480]
